# Supplementary figures and images for: Transcriptomic Profiling of Fusarium pseudograminearum in Response to Carbendazim, Pyraclostrobin, Tebuconazole, and Phenamacril
Source: MDPI journal article supplement (doi:10.3390/jof9030334), 2023-03-08

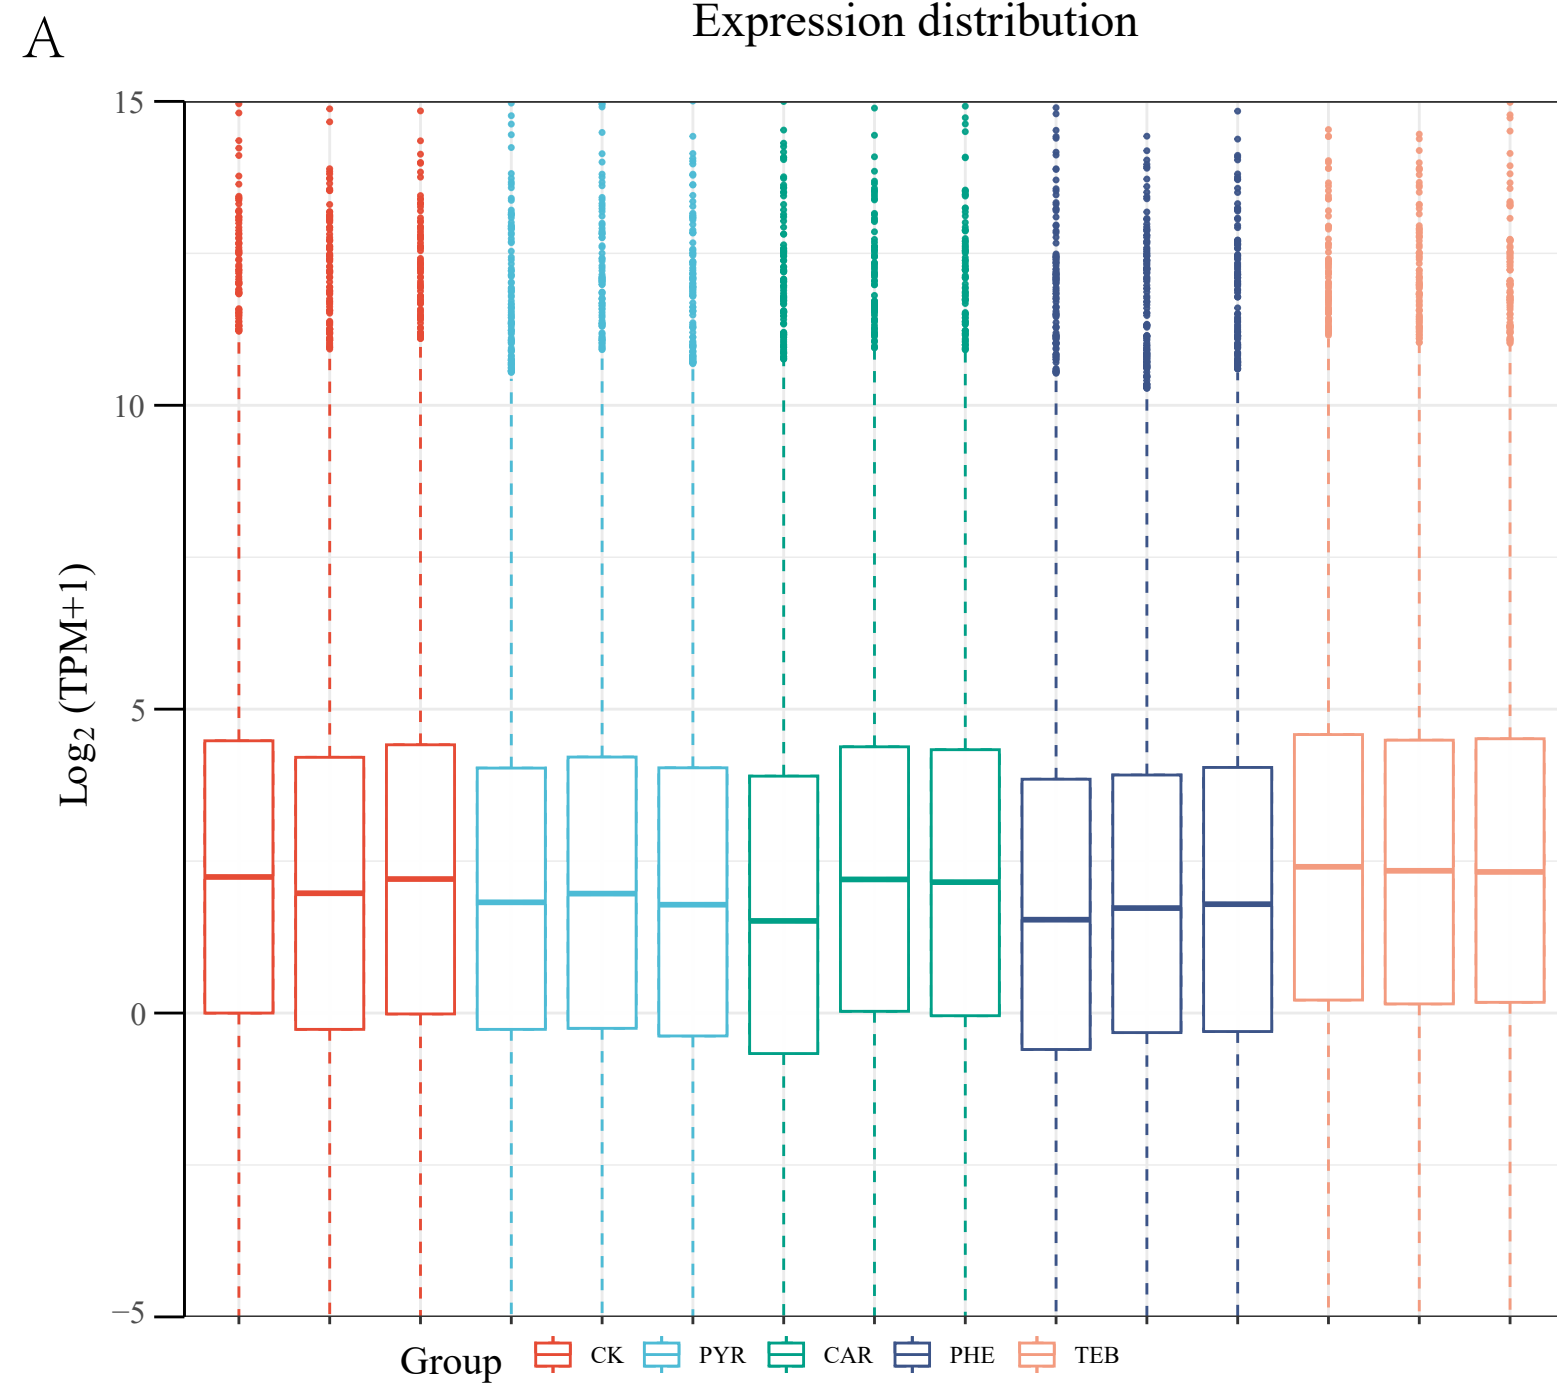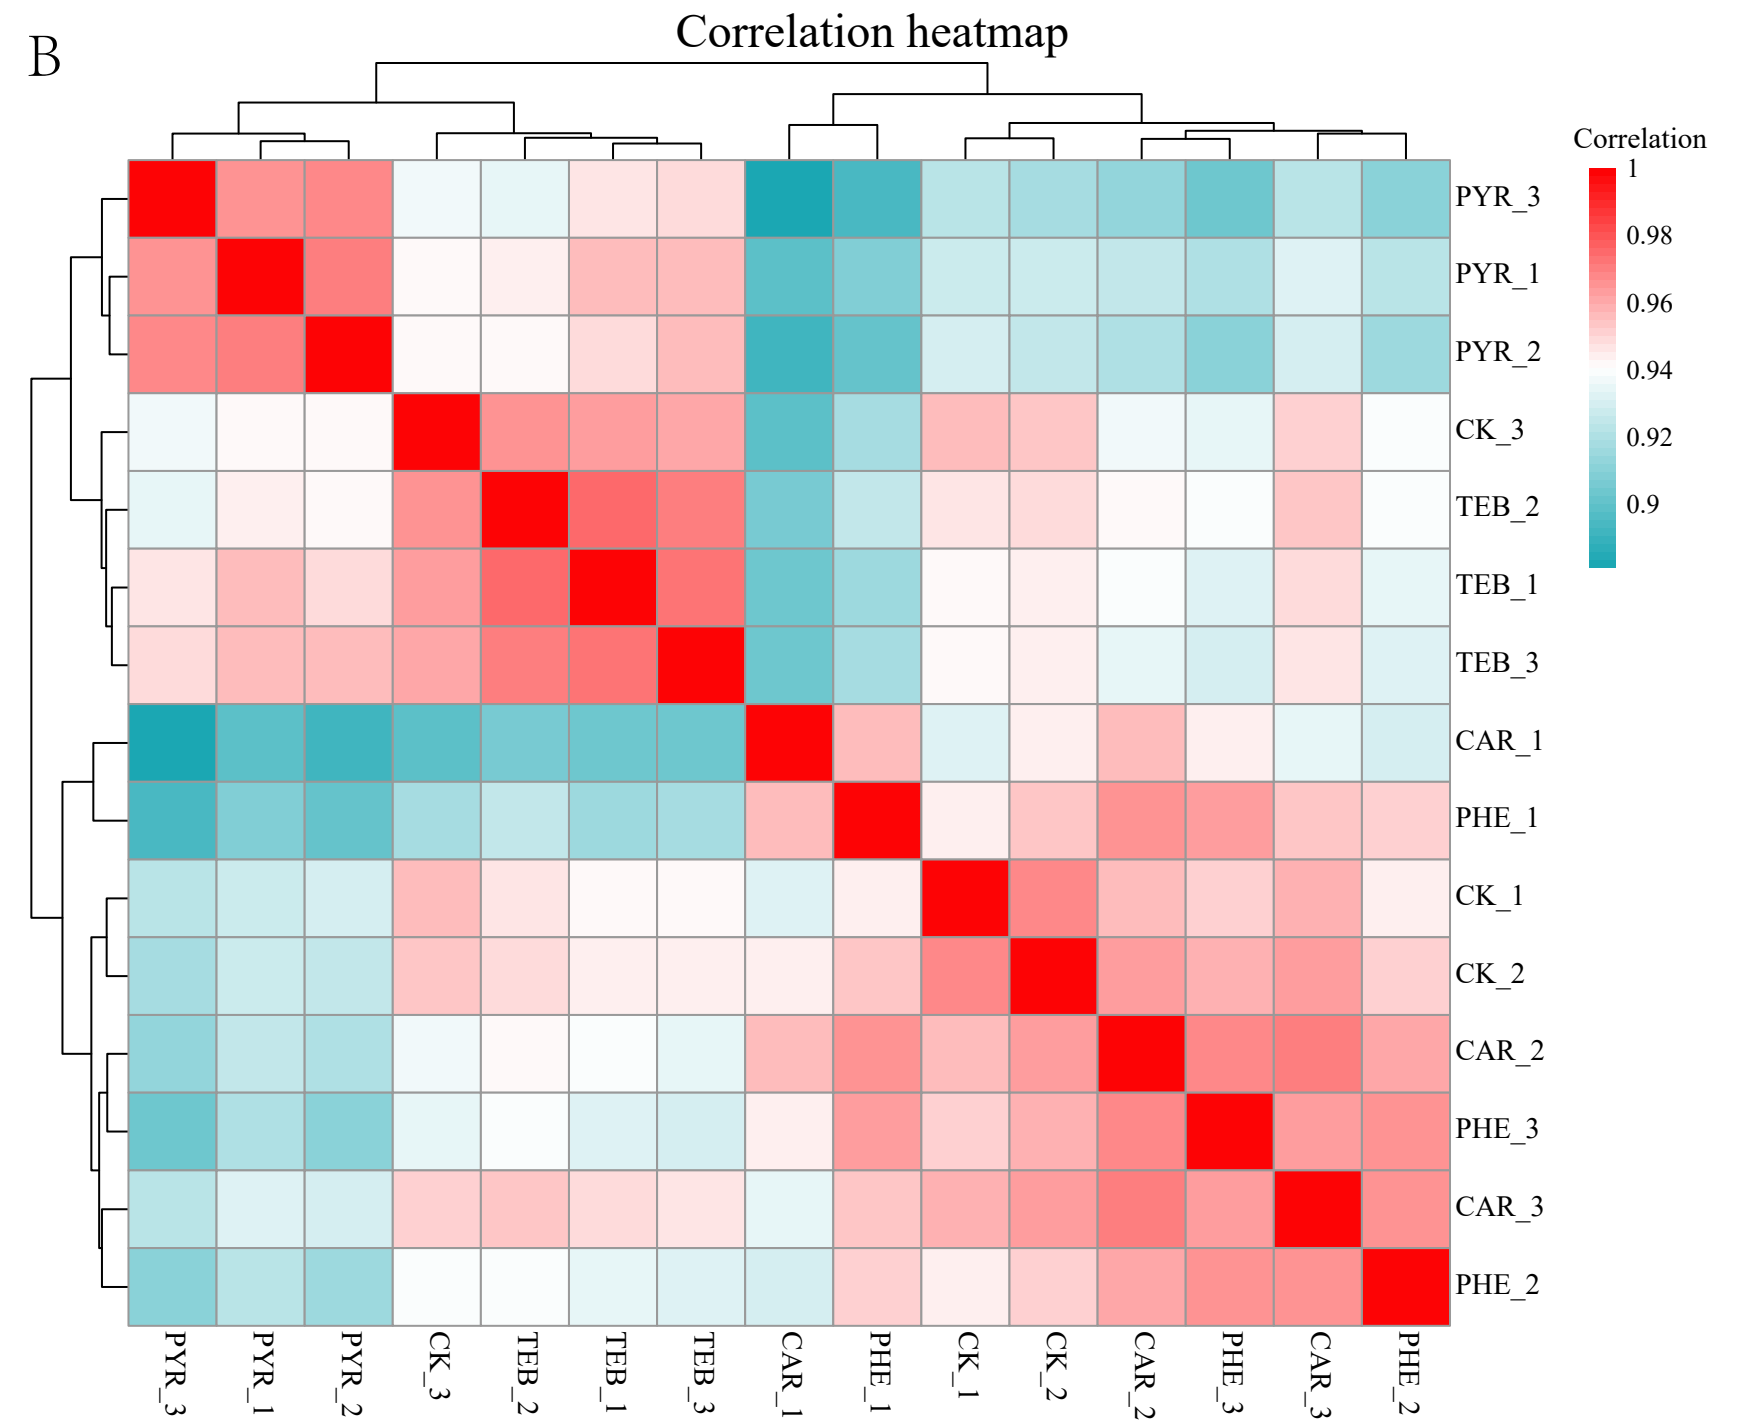

Supplement: s1 [file s1]

# Kegg Enrichment Analysis

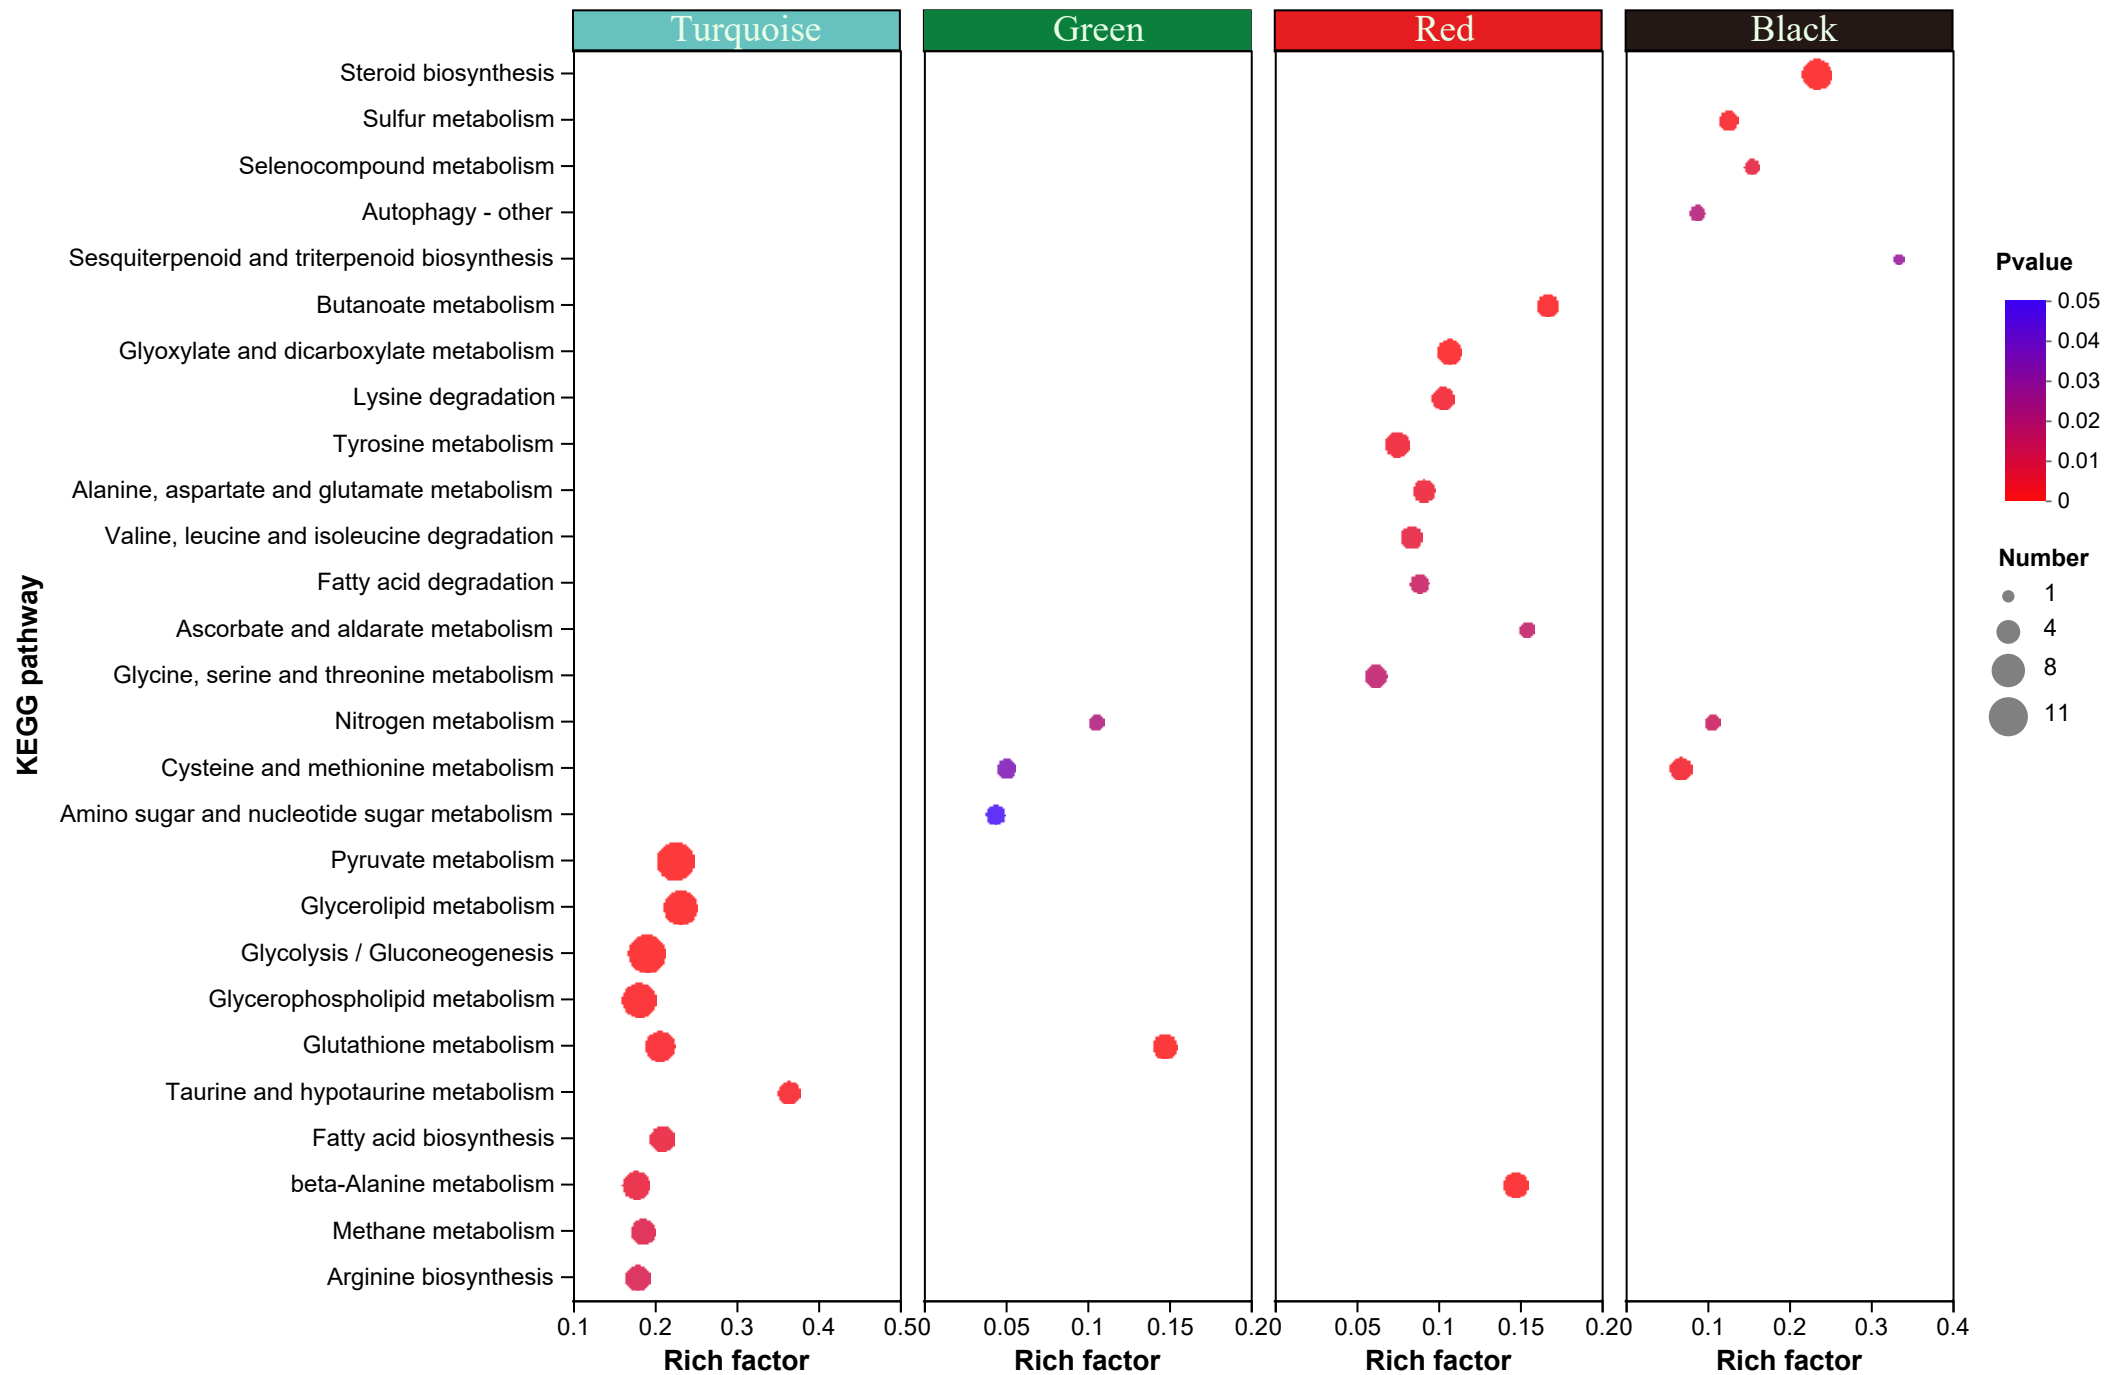

Supplement: s1 [file s1]
